# Supplementary material for: Two non-centrosymmetric mixed alkali metal and alkaline earth metal scandium borate nonlinear optical materials with short ultraviolet cutoff edges
Source: Royal Society of Chemistry journal article supplement (doi:10.1039/d3dt00197k), 2023-01-01
Supplement: d3dt00197k1.pdf [file d3dt00197k1.pdf]

**Electronic Supplementary information for**

**Two Non-Centrosymmetric Mixed Alkali Metal and Alkaline Earth  
Metal Scandium Borate Nonlinear Optical Materials with Short  
Ultraviolet Cutoff Edges**

Wenhao Liu,<sup>a,b,c</sup> Ming-Hsien Lee,<sup>d</sup> Ruixin Guo,<sup>a,b</sup> and Jiyong Yao<sup>a,b,\*</sup>

a Beijing Center for Crystal Research and Development, Key Lab of Functional Crystals and Laser Technology, Technical Institute of Physics and Chemistry, Chinese Academy of Sciences, Beijing 100190, P. R. China.

b Center of Materials Science and Optoelectronics Engineering, University of Chinese Academy of Sciences, Beijing 100049, P. R. China.

c University of Chinese Academy of Sciences, Beijing 100049, P. R. China.

d Department of Physics, Tamkang University, Tamsui, New Taipei 25137, Taiwan.

\*Corresponding author:

Jiyong

Yao;

[jyao@mail.ipc.ac.cn](mailto:jyao@mail.ipc.ac.cn)

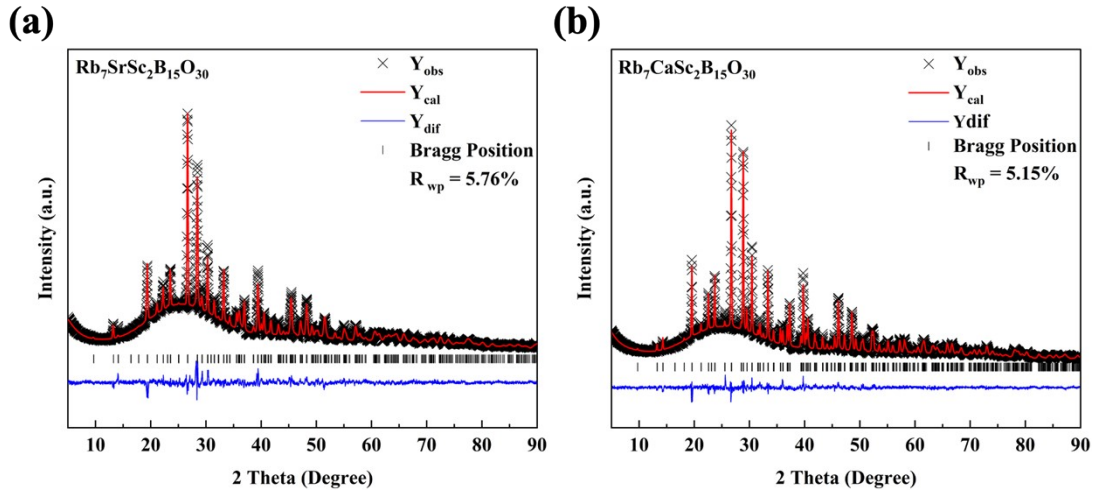

Figure S1. Refined powder XRD patterns of (a)  $\text{Rb}_7\text{SrSc}_2\text{B}_{15}\text{O}_{30}$  and (b)  $\text{Rb}_7\text{CaSc}_2\text{B}_{15}\text{O}_{30}$ : the red line and blue line show calculated data and the difference, respectively; the black "x" and black "|" are the experimental data and Bragg positions of samples, respectively.

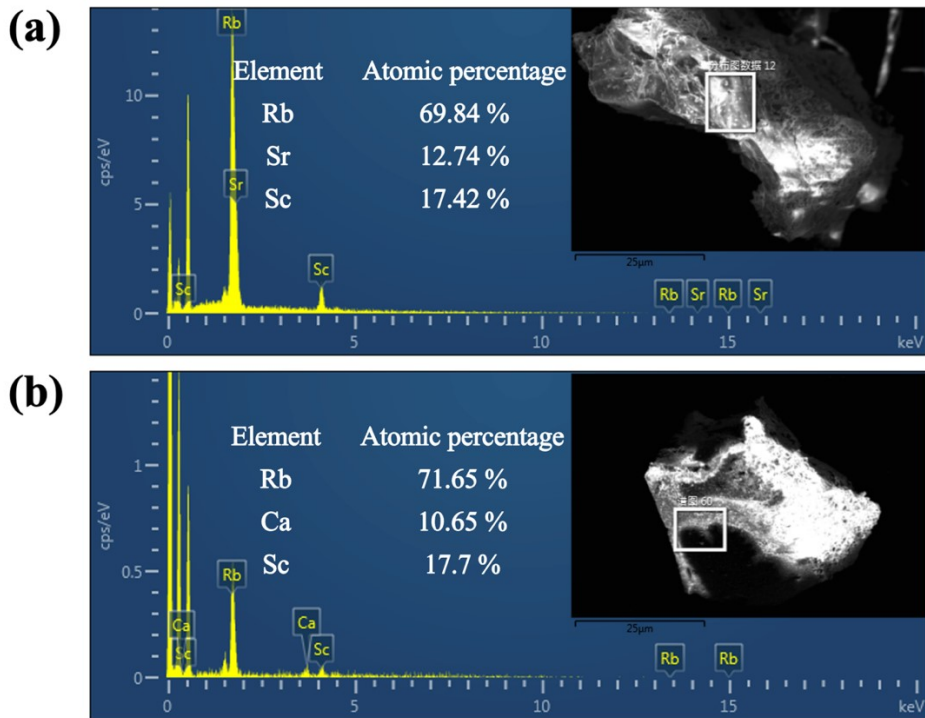

Figure S2. The heavy element analysis spectra and atomic percentages of (a)  $\text{Rb}_7\text{SrSc}_2\text{B}_{15}\text{O}_{30}$  and (b)  $\text{Rb}_7\text{CaSc}_2\text{B}_{15}\text{O}_{30}$ .

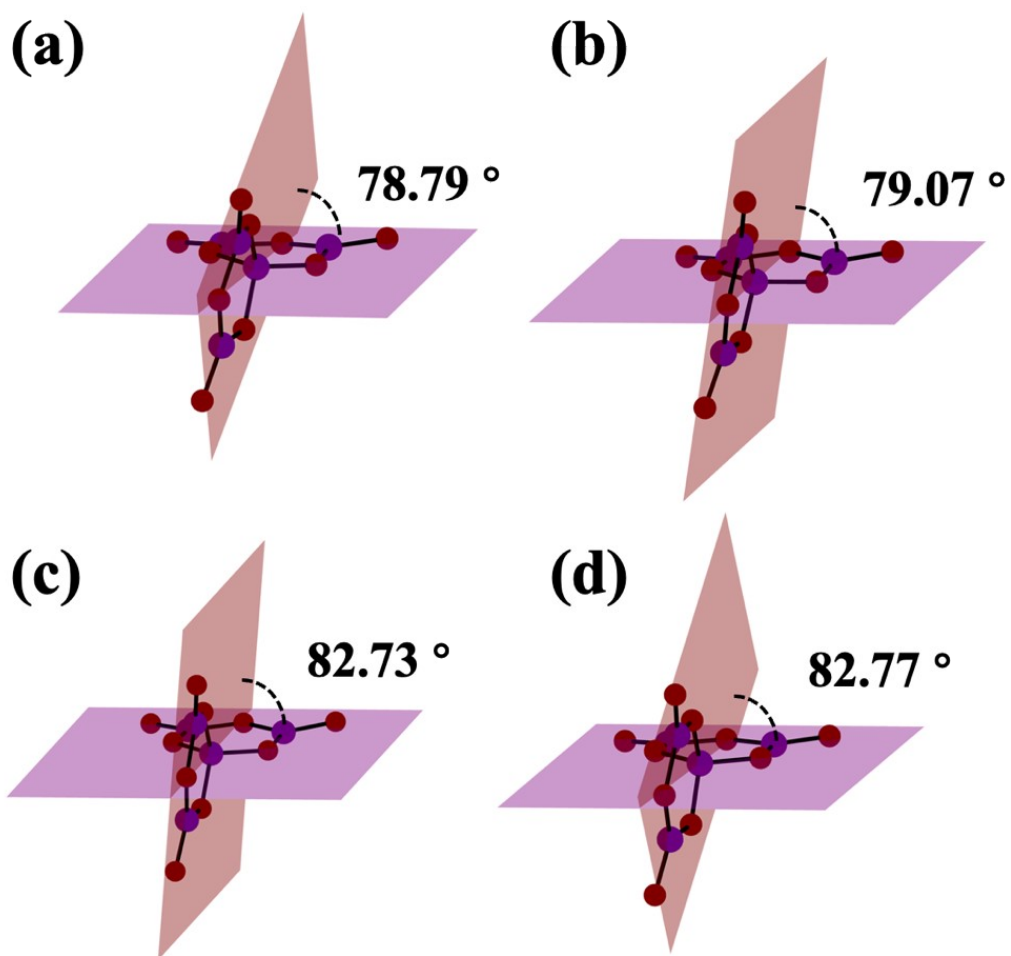

Figure S3. The dihedral angles of  $B_5O_{10}$  groups in (a)  $Rb_7SrSc_2B_{15}O_{30}$ , (b)  $Rb_7CaSc_2B_{15}O_{30}$ , (c)  $Rb_7SrY_2B_{15}O_{30}$ , and (d)  $Rb_7SrGd_2B_{15}O_{30}$ .

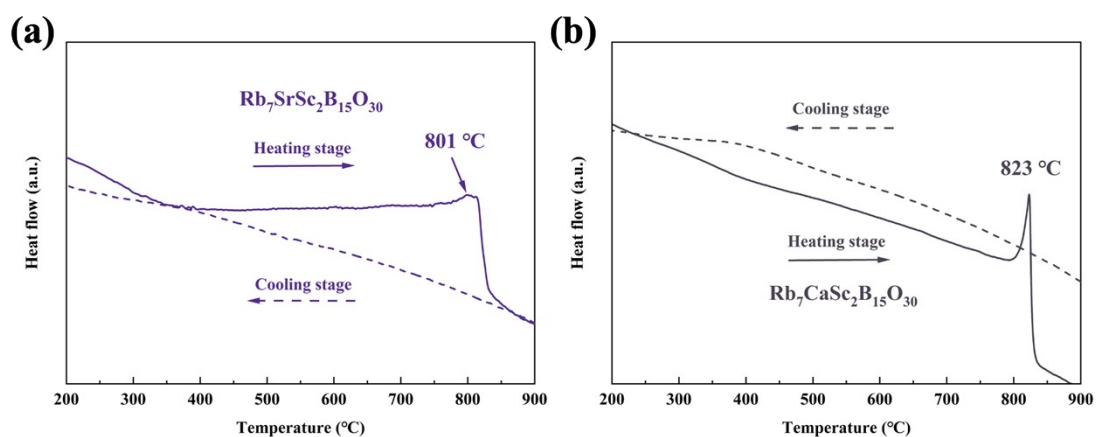

Figure S4. DCS curves of (a)  $Rb_7SrSc_2B_{15}O_{30}$  and (b)  $Rb_7CaSc_2B_{15}O_{30}$ .

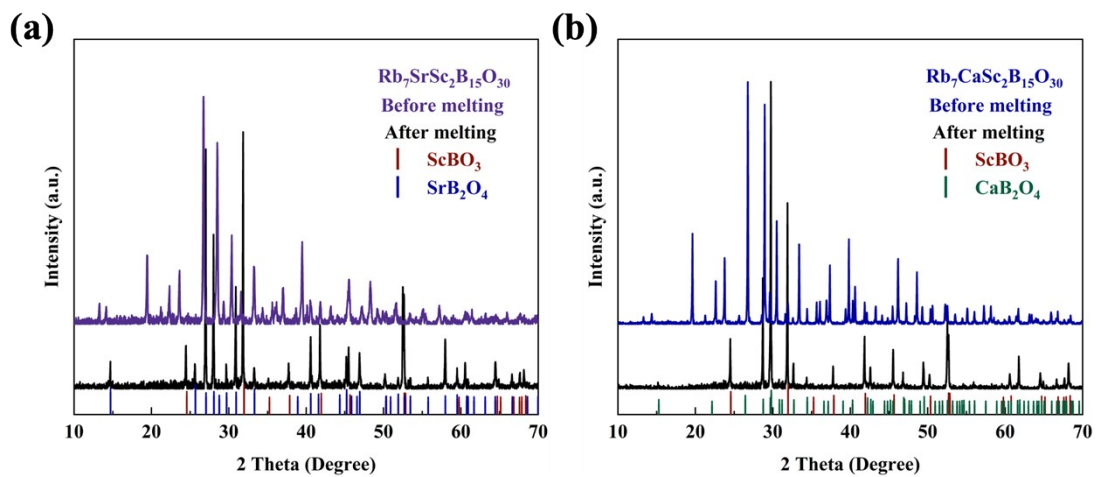

Figure S5. XRD patterns before and after melting of (a) Rb<sub>7</sub>SrSc<sub>2</sub>B<sub>15</sub>O<sub>30</sub> and (b) Rb<sub>7</sub>CaSc<sub>2</sub>B<sub>15</sub>O<sub>30</sub>.

Table S1. Cell parameters and nonlinear optical properties of related borate compounds containing the equal fundamental building block B<sub>5</sub>O<sub>10</sub> group.

| No. | Compounds                                                                                                         | Space group | a/Å   | b/Å   | c/Å   | Cut-off/nm | SHG response           | Phase matching | Equal structure type (No.) |
|-----|-------------------------------------------------------------------------------------------------------------------|-------------|-------|-------|-------|------------|------------------------|----------------|----------------------------|
| 1   | K <sub>3</sub> ScB <sub>6</sub> O <sub>12</sub> <sup>1</sup>                                                      | R32         | 13.09 | 13.09 | 14.61 | <274       | 1.3×KDP                | NO             | 3                          |
| 2   | K <sub>3</sub> YB <sub>6</sub> O <sub>12</sub> <sup>2</sup>                                                       | R32         | 13.22 | 13.22 | 30.28 | 195        | 0.1×KDP                | NA             | 4-6                        |
| 3   | Rb <sub>3</sub> YB <sub>6</sub> O <sub>12</sub> <sup>3</sup>                                                      | R32         | 13.38 | 13.38 | 15.20 | <200       | 0.8×KDP                | YES            | 1                          |
| 4   | Rb <sub>3</sub> NdB <sub>6</sub> O <sub>12</sub> <sup>4</sup>                                                     | R32         | 13.52 | 13.52 | 31.16 | 197        | 4×α-SiO <sub>2</sub>   | NA             | 2, 5, 6                    |
| 5   | Rb <sub>3</sub> EuB <sub>6</sub> O <sub>12</sub> <sup>5</sup>                                                     | R32         | 13.47 | 13.47 | 30.84 | NA         | 16×α-SiO <sub>2</sub>  | NA             | 2, 4, 6                    |
| 6   | Rb <sub>3</sub> SmB <sub>6</sub> O <sub>12</sub> <sup>6</sup>                                                     | R32         | 13.48 | 13.48 | 30.93 | NA         | 6.5×α-SiO <sub>2</sub> | NA             | 2, 4, 5                    |
| 7   | K <sub>6</sub> LiCaSc <sub>2</sub> B <sub>15</sub> O <sub>30</sub> <sup>7</sup>                                   | R32         | 12.65 | 12.65 | 15.18 | <200       | 0.4×KDP                | YES            | 7-10                       |
| 8   | K <sub>6</sub> NaCaSc <sub>2</sub> B <sub>15</sub> O <sub>30</sub> <sup>7</sup>                                   | R32         | 12.76 | 12.76 | 15.03 | <200       | 0.4×KDP                | YES            | 7-10                       |
| 9   | K <sub>6</sub> Li <sub>0.7</sub> Na <sub>0.3</sub> CaSc <sub>2</sub> B <sub>15</sub> O <sub>30</sub> <sup>7</sup> | R32         | 12.69 | 12.69 | 15.11 | 190        | 0.4×KDP                | YES            | 7-10                       |
| 10  | K <sub>6</sub> NaSrSc <sub>2</sub> B <sub>15</sub> O <sub>30</sub> <sup>1</sup>                                   | R32         | 12.80 | 12.80 | 15.28 | <248       | 0.7×KDP                | YES            | 7-10                       |
| 11  | K <sub>6</sub> Li <sub>3</sub> Sc <sub>2</sub> B <sub>15</sub> O <sub>30</sub> <sup>8</sup>                       | R32         | 12.71 | 12.71 | 14.91 | 190        | 1×KDP                  | NO             | --                         |
| 12  | K <sub>7</sub> Li <sub>2</sub> Y <sub>2</sub> B <sub>15</sub> O <sub>30</sub> <sup>9</sup>                        | R32         | 13.35 | 13.35 | 14.70 | <244       | 0.8×KDP                | YES            | --                         |
| 13  | K <sub>7</sub> CaY <sub>2</sub> B <sub>15</sub> O <sub>30</sub> <sup>10</sup>                                     | R32         | 13.21 | 13.21 | 14.94 | <190       | 0.9×KDP                | YES            | 13-26                      |
| 14  | K <sub>7</sub> SrY <sub>2</sub> B <sub>15</sub> O <sub>30</sub> <sup>10</sup>                                     | R32         | 13.11 | 13.11 | 15.31 | <190       | 1.1×KDP                | YES            | 13-26                      |
| 15  | K <sub>7</sub> BaY <sub>2</sub> B <sub>15</sub> O <sub>30</sub> <sup>10</sup>                                     | R32         | 12.98 | 12.98 | 15.71 | <190       | 1.2×KDP                | YES            | 13-26                      |
| 16  | K <sub>7</sub> CdGd <sub>2</sub> B <sub>15</sub> O <sub>30</sub> <sup>11</sup>                                    | R32         | 13.31 | 13.31 | 14.85 | <206       | 1.7×KDP                | YES            | 13-26                      |
| 17  | K <sub>7</sub> CdLu <sub>2</sub> B <sub>15</sub> O <sub>30</sub> <sup>11</sup>                                    | R32         | 13.15 | 13.15 | 14.82 | <192       | 1.9×KDP                | YES            | 13-26                      |
| 18  | K <sub>7</sub> CdSc <sub>2</sub> B <sub>15</sub> O <sub>30</sub> <sup>11</sup>                                    | R32         | 13.11 | 13.11 | 14.62 | <200       | 1.5×KDP                | YES            | 13-26                      |
| 19  | K <sub>7</sub> CdY <sub>2</sub> B <sub>15</sub> O <sub>30</sub> <sup>11</sup>                                     | R32         | 13.29 | 13.29 | 14.87 | <200       | 1.6×KDP                | YES            | 13-26                      |
| 20  | K <sub>7</sub> PbY <sub>2</sub> B <sub>15</sub> O <sub>30</sub> <sup>11</sup>                                     | R32         | 13.10 | 13.10 | 15.32 | NA         | 2.1×KDP                | YES            | 13-26                      |
| 21  | K <sub>7</sub> CaBi <sub>2</sub> B <sub>15</sub> O <sub>30</sub> <sup>12</sup>                                    | R32         | 13.33 | 13.33 | 14.98 | <282       | 0.6×KDP                | YES            | 13-26                      |
| 22  | K <sub>7</sub> CaLa <sub>2</sub> B <sub>15</sub> O <sub>30</sub> <sup>12</sup>                                    | R32         | 13.45 | 13.45 | 15.23 | NA         | NA                     | NA             | 13-26                      |
| 23  | Rb <sub>7</sub> SrY <sub>2</sub> B <sub>15</sub> O <sub>30</sub> <sup>13</sup>                                    | R32         | 13.45 | 13.45 | 15.17 | <300       | 0.9×KDP                | NO             | 13-26                      |
| 24  | Rb <sub>7</sub> SrGd <sub>2</sub> B <sub>15</sub> O <sub>30</sub> <sup>14</sup>                                   | R32         | 13.49 | 13.49 | 15.32 | <225       | 0.5×KDP                | NO             | 13-26                      |
| 25  | Rb <sub>7</sub> SrSc <sub>2</sub> B <sub>15</sub> O <sub>30</sub> <sup>TW</sup>                                   | R32         | 13.32 | 13.32 | 14.81 | <200       | 0.76×KDP               | NO             | 13-26                      |
| 26  | Rb <sub>7</sub> CaSc <sub>2</sub> B <sub>15</sub> O <sub>30</sub> <sup>TW</sup>                                   | R32         | 13.31 | 13.31 | 14.59 | <200       | 0.88×KDP               | NO             | 13-26                      |
| 27  | K <sub>21</sub> Yb <sub>8</sub> B <sub>45</sub> O <sub>90</sub> <sup>15</sup>                                     | R32         | 13.20 | 13.20 | 14.76 | 210        | 1×KDP                  | NO             | --                         |

“NA” means that the experimental data is not applicable, and “TW” means that the compound report in this work.

Table S2. Crystallographic data and structure refinements for Rb<sub>7</sub>SrSc<sub>2</sub>B<sub>15</sub>O<sub>30</sub> and Rb<sub>7</sub>CaSc<sub>2</sub>B<sub>15</sub>O<sub>30</sub>.

| Empirical formula                                            | Rb <sub>7</sub> SrSc <sub>2</sub> B <sub>15</sub> O <sub>30</sub>                                             | Rb <sub>7</sub> CaSc <sub>2</sub> B <sub>15</sub> O <sub>30</sub>            |
|--------------------------------------------------------------|---------------------------------------------------------------------------------------------------------------|------------------------------------------------------------------------------|
| Temperature/K                                                | 296.15                                                                                                        | 296.15                                                                       |
| Crystal system                                               | trigonal                                                                                                      | trigonal                                                                     |
| Space group                                                  | <i>R</i> 32                                                                                                   | <i>R</i> 32                                                                  |
| <i>a</i> /Å                                                  | 13.3256(10)                                                                                                   | 13.3114(10)                                                                  |
| <i>c</i> /Å                                                  | 14.8199(16)                                                                                                   | 14.5992(16)                                                                  |
| $\alpha$ /°                                                  | 90                                                                                                            | 90                                                                           |
| $\beta$ /°                                                   | 90                                                                                                            | 90                                                                           |
| $\gamma$ /°                                                  | 120                                                                                                           | 120                                                                          |
| Volume/Å <sup>3</sup>                                        | 2279.0(4)                                                                                                     | 2240.3(4)                                                                    |
| <i>Z</i>                                                     | 3                                                                                                             | 3                                                                            |
| $\rho_{\text{calc}}$ /cm <sup>3</sup>                        | 3.099                                                                                                         | 3.047                                                                        |
| $\mu$ /mm <sup>-1</sup>                                      | 13.439                                                                                                        | 12.077                                                                       |
| <i>F</i> (000)                                               | 1962.0                                                                                                        | 1908.0                                                                       |
| Radiation                                                    | Mo K $\alpha$ ( $\lambda$ = 0.71073)                                                                          | Mo K $\alpha$ ( $\lambda$ = 0.71073)                                         |
| 2 $\theta$ range for data collection/°                       | 4.474 to 55.612                                                                                               | 4.502 to 60.928                                                              |
| Index ranges                                                 | -17 ≤ <i>h</i> ≤ 16, -16 ≤ <i>k</i> ≤ 15, -19 ≤ -18 ≤ <i>h</i> ≤ 17, -18 ≤ <i>k</i> ≤ 18, -20 ≤ <i>l</i> ≤ 19 |                                                                              |
| Reflections collected                                        | 8878                                                                                                          | 9023                                                                         |
| Independent reflections                                      | 1132 [ <i>R</i> <sub>int</sub> = 0.0973, <i>R</i> <sub>sigma</sub> = 0.0996]                                  | 1513 [ <i>R</i> <sub>int</sub> = 0.0946, <i>R</i> <sub>sigma</sub> = 0.1184] |
| Goodness-of-fit on <i>F</i> <sup>2</sup>                     | 1.062                                                                                                         | 1.025                                                                        |
| Final <i>R</i> indexes [ <i>I</i> ≥ 2 $\sigma$ ( <i>I</i> )] | <i>R</i> <sub>1</sub> = 0.0611, <i>wR</i> <sub>2</sub> = 0.1575                                               | <i>R</i> <sub>1</sub> = 0.0508, <i>wR</i> <sub>2</sub> = 0.0844              |
| Final <i>R</i> indexes [all data]                            | <i>R</i> <sub>1</sub> = 0.1084, <i>wR</i> <sub>2</sub> = 0.1772                                               | <i>R</i> <sub>1</sub> = 0.1145, <i>wR</i> <sub>2</sub> = 0.0974              |
| Largest diff. peak/hole / e Å <sup>-3</sup>                  | 1.90/-2.84                                                                                                    | 0.86/-0.99                                                                   |
| Flack parameter                                              | 0.19(6)                                                                                                       | 0.036(15)                                                                    |

<sup>a</sup>*R*<sub>1</sub> =  $\sum ||F_o| - |F_c|| / \sum |F_o|$ , and *wR*<sub>2</sub> =  $[\sum w(F_o^2 - F_c^2)^2 / \sum wF_o^4]^{1/2}$  for *F*<sub>o</sub><sup>2</sup> > 2 $\sigma$  (*F*<sub>o</sub><sup>2</sup>).

Table S3. Atomic coordinates and equivalent isotropic temperature factors for  $\text{Rb}_7\text{SrSc}_2\text{B}_{15}\text{O}_{30}$ .

| Atom | $x \times 10^4$ | $y \times 10^4$ | $z \times 10^4$ | $U_{\text{eq}} (\text{\AA}^2 \times 10^3)$ |
|------|-----------------|-----------------|-----------------|--------------------------------------------|
| Rb1  | 4547(2)         | 10000           | 5000            | 28.9(8)                                    |
| Rb2  | 6667            | 8098(2)         | 3333            | 33.6(9)                                    |
| Rb3  | 3333            | 6667            | 6667            | 34.2(14)                                   |
| Sr   | 10000           | 10000           | 5000            | 54.4(19)                                   |
| Sc   | 3333            | 6667            | 3888(3)         | 0.7(10)                                    |
| B1   | 5951(19)        | 9284(19)        | 6667            | 30(9)                                      |
| B2   | 7500(30)        | 8980(20)        | 6040(20)        | 52(9)                                      |
| B3   | 5634(17)        | 8032(19)        | 5284(15)        | 26(6)                                      |
| O1   | 5281(12)        | 8618(12)        | 5870(8)         | 25(3)                                      |
| O2   | 6038(12)        | 10406(12)       | 6638(11)        | 35(4)                                      |
| O3   | 4917(12)        | 7299(13)        | 4672(10)        | 34(4)                                      |
| O4   | 6742(10)        | 8235(12)        | 5403(12)        | 37(4)                                      |
| O5   | 8626(12)        | 9257(16)        | 6070(13)        | 49(4)                                      |

Table S4. Atomic coordinates and equivalent isotropic temperature factors for  $\text{Rb}_7\text{CaSc}_2\text{B}_{15}\text{O}_{30}$ .

| Atom | $x \times 10^4$ | $y \times 10^4$ | $z \times 10^4$ | $U_{\text{eq}} (\text{\AA}^2 \times 10^3)$ |
|------|-----------------|-----------------|-----------------|--------------------------------------------|
| Rb1  | 3333            | 1206.7(10)      | 6667            | 29.4(4)                                    |
| Rb2  | 5242.8(11)      | 5242.8(11)      | 5000            | 33.1(4)                                    |
| Rb3  | 6667            | 3333            | 8333            | 30.7(7)                                    |
| Ca   | 3333            | 6667            | 6667            | 12.3(10)                                   |
| Sc   | 6667            | 3333            | 5549(2)         | 18.2(7)                                    |
| B1   | 4099(12)        | 3333            | 8333            | 17(4)                                      |
| B2   | 5314(10)        | 4251(10)        | 6958(7)         | 19(3)                                      |
| B3   | 4383(10)        | 5225(10)        | 7704(8)         | 24(3)                                      |
| O1   | 4728(6)         | 3327(5)         | 7519(4)         | 21.9(16)                                   |
| O2   | 3962(6)         | 4365(6)         | 8357(4)         | 28.7(17)                                   |
| O3   | 5122(6)         | 5188(6)         | 7048(5)         | 36.9(18)                                   |
| O4   | 4094(7)         | 6048(6)         | 7728(4)         | 32.0(18)                                   |
| O5   | 6059(6)         | 4292(6)         | 6317(4)         | 26.7(17)                                   |



Table S5. Selected bond lengths in Å for Rb<sub>7</sub>SrSc<sub>2</sub>B<sub>15</sub>O<sub>30</sub>.

| Atom | Atom             | Length/Å  | Atom | Atom             | Length/Å  |
|------|------------------|-----------|------|------------------|-----------|
| Rb1  | O1 <sup>1</sup>  | 2.795(13) | Rb3  | O1 <sup>2</sup>  | 2.853(15) |
| Rb1  | O1               | 2.795(13) | Sr   | O5 <sup>6</sup>  | 2.244(16) |
| Rb1  | O2               | 3.009(16) | Sr   | O5 <sup>13</sup> | 2.244(16) |
| Rb1  | O2 <sup>1</sup>  | 3.009(16) | Sr   | O5 <sup>1</sup>  | 2.244(16) |
| Rb1  | O3 <sup>2</sup>  | 2.925(16) | Sr   | O5 <sup>14</sup> | 2.244(16) |
| Rb1  | O3 <sup>3</sup>  | 2.925(16) | Sr   | O5               | 2.244(16) |
| Rb1  | O4 <sup>2</sup>  | 3.269(14) | Sr   | O5 <sup>15</sup> | 2.244(16) |
| Rb1  | O4 <sup>3</sup>  | 3.269(14) | Sc   | O3 <sup>2</sup>  | 2.176(15) |
| Rb2  | O2 <sup>1</sup>  | 2.937(15) | Sc   | O3               | 2.176(15) |
| Rb2  | O2 <sup>4</sup>  | 2.937(15) | Sc   | O3 <sup>9</sup>  | 2.176(15) |
| Rb2  | O3               | 2.833(14) | Sc   | O5 <sup>7</sup>  | 2.331(18) |
| Rb2  | O3 <sup>5</sup>  | 2.833(14) | Sc   | O5 <sup>12</sup> | 2.331(18) |
| Rb2  | O4               | 3.071(17) | Sc   | O5 <sup>4</sup>  | 2.331(18) |
| Rb2  | O4 <sup>5</sup>  | 3.071(17) | B1   | O1               | 1.479(18) |
| Rb2  | O5 <sup>6</sup>  | 3.28(2)   | B1   | O2               | 1.441(17) |
| Rb2  | O5 <sup>7</sup>  | 3.28(2)   | B2   | O4               | 1.38(2)   |
| Rb3  | O1 <sup>8</sup>  | 2.853(15) | B2   | O5               | 1.36(3)   |
| Rb3  | O1 <sup>9</sup>  | 2.853(15) | B2   | O2 <sup>10</sup> | 1.35(3)   |
| Rb3  | O1 <sup>10</sup> | 2.853(15) | B3   | O1               | 1.40(3)   |
| Rb3  | O1               | 2.853(15) | B3   | O3               | 1.33(2)   |
| Rb3  | O1 <sup>11</sup> | 2.853(15) | B3   | O4               | 1.37(2)   |

<sup>1</sup>1-Y+X,2-Y,1-Z; <sup>2</sup>1-Y,1+X-Y,+Z; <sup>3</sup>1-X,1-X+Y,1-Z; <sup>4</sup>1/3+Y-X,5/3-X,-1/3+Z; <sup>5</sup>4/3-X,2/3-X+Y,2/3-Z; <sup>6</sup>+Y,+X,1-Z; <sup>7</sup>4/3-Y,2/3+X-Y,-1/3+Z; <sup>8</sup>2/3-X,1/3-X+Y,4/3-Z; <sup>9</sup>+Y-X,1-X,+Z; <sup>10</sup>-1/3+Y,1/3+X,4/3-Z; <sup>11</sup>2/3-Y+X,4/3-Y,4/3-Z; <sup>12</sup>-2/3+X,-1/3+Y,-1/3+Z; <sup>13</sup>2-Y,1+X-Y,+Z; <sup>14</sup>1+Y-X,2-X,+Z; <sup>15</sup>2-X,1-X+Y,1-Z; <sup>16</sup>5/3-Y,4/3+X-Y,1/3+Z; <sup>17</sup>2/3+Y-X,4/3-X,1/3+Z; <sup>18</sup>2/3+X,1/3+Y,1/3+Z

Table S6. Selected bond lengths in Å for Rb<sub>7</sub>CaSc<sub>2</sub>B<sub>15</sub>O<sub>30</sub>.

| Atom | Atom             | Length/Å | Atom | Atom             | Length/Å  |
|------|------------------|----------|------|------------------|-----------|
| Rb1  | O1 <sup>4</sup>  | 2.779(6) | Rb3  | O1               | 2.838(7)  |
| Rb1  | O1               | 2.779(6) | Ca   | O4 <sup>8</sup>  | 2.222(6)  |
| Rb1  | O2 <sup>5</sup>  | 2.992(7) | Ca   | O4 <sup>4</sup>  | 2.222(6)  |
| Rb1  | O2 <sup>1</sup>  | 2.992(7) | Ca   | O4 <sup>15</sup> | 2.222(6)  |
| Rb1  | O3 <sup>3</sup>  | 3.223(7) | Ca   | O4 <sup>14</sup> | 2.222(6)  |
| Rb1  | O3 <sup>2</sup>  | 3.223(7) | Ca   | O4               | 2.222(6)  |
| Rb1  | O5 <sup>3</sup>  | 2.907(7) | Ca   | O4 <sup>13</sup> | 2.222(6)  |
| Rb1  | O5 <sup>2</sup>  | 2.907(7) | Sc   | O4 <sup>16</sup> | 2.319(7)  |
| Rb2  | O2 <sup>4</sup>  | 2.943(7) | Sc   | O4 <sup>1</sup>  | 2.319(7)  |
| Rb2  | O2 <sup>1</sup>  | 2.943(7) | Sc   | O4 <sup>7</sup>  | 2.319(7)  |
| Rb2  | O3 <sup>6</sup>  | 2.993(7) | Sc   | O5 <sup>9</sup>  | 2.138(6)  |
| Rb2  | O3               | 2.993(7) | Sc   | O5 <sup>3</sup>  | 2.138(6)  |
| Rb2  | O4 <sup>7</sup>  | 3.255(8) | Sc   | O5               | 2.138(6)  |
| Rb2  | O4 <sup>8</sup>  | 3.255(8) | B1   | O1               | 1.456(10) |
| Rb2  | O5               | 2.803(6) | B1   | O2               | 1.474(11) |
| Rb2  | O5 <sup>6</sup>  | 2.803(6) | B2   | O1               | 1.354(12) |
| Rb3  | O1 <sup>3</sup>  | 2.838(7) | B2   | O3               | 1.399(12) |
| Rb3  | O1 <sup>5</sup>  | 2.838(7) | B2   | O5               | 1.345(12) |
| Rb3  | O1 <sup>10</sup> | 2.838(7) | B3   | O2               | 1.374(12) |
| Rb3  | O1 <sup>11</sup> | 2.838(7) | B3   | O3               | 1.392(12) |
| Rb3  | O1 <sup>9</sup>  | 2.838(7) | B3   | O4               | 1.331(12) |

<sup>1</sup>1/3+Y-X,2/3-X,-1/3+Z; <sup>2</sup>-1/3+Y,-2/3+X,4/3-Z; <sup>3</sup>1-Y,+X-Y,+Z; <sup>4</sup>2/3-X,1/3-X+Y,4/3-Z; <sup>5</sup>1/3-Y+X,2/3-Y,5/3-Z; <sup>6</sup>+Y,+X,1-Z; <sup>7</sup>4/3-Y,2/3+X-Y,-1/3+Z; <sup>8</sup>2/3-Y+X,4/3-Y,4/3-Z; <sup>9</sup>1+Y-X,1-X,+Z; <sup>10</sup>1/3+Y,-1/3+X,5/3-Z; <sup>11</sup>4/3-X,2/3-X+Y,5/3-Z; <sup>12</sup>-1/3+X,1/3+Y,1/3+Z; <sup>13</sup>-1/3+Y,1/3+X,4/3-Z; <sup>14</sup>1-Y,1+X-Y,+Z; <sup>15</sup>+Y-X,1-X,+Z; <sup>16</sup>1/3+X,-1/3+Y,-1/3+Z; <sup>17</sup>2/3-Y,1/3+X-Y,1/3+Z; <sup>18</sup>2/3+Y-X,4/3-X,1/3+Z

## References

1. W. Liu, X. Liu, X. Meng, C. Li, M. Sun, Z. Lin and J. Yao, *J. Alloys Compd.*, 2022, **902**, 163832.
2. S. Zhao, G. Zhang, J. Yao and Y. Wu, *Mater. Res. Bull.*, 2012, **47**, 3810-3813.
3. Z. Jia, Q. Zeng, P. Gong, Y. Dong, X. Zhang, B. Xin, Z. Lin and M. Xia, *Inorg. Chem.*, 2020, **59**, 13029-13033.
4. V. V. Atuchin, A. K. Subanakov, A. S. Aleksandrovsky, B. G. Bazarov, J. G. Bazarova, S. G. Dorzhieva, T. A. Gavrilova, A. S. Krylov, M. S. Molokeevev, A. S. Oreshonkov, A. M. Pugachev, Y. L. Tushinova and A. P. Yelisseyev, *Adv. Powder Technol.*, 2017, **28**, 1309-1315.
5. V. V. Atuchin, A. K. Subanakov, A. S. Aleksandrovsky, B. G. Bazarov, J. G. Bazarova, T. A. Gavrilova, A. S. Krylov, M. S. Molokeevev, A. S. Oreshonkov and S. Y. Stefanovich, *Mater. Des.*, 2018, **140**, 488-494.
6. V. Atuchin, A. Subanakov, A. Aleksandrovsky, B. Bazarov, J. Bazarova, A. Krylov, M. Molokeevev, A. Oreshonkov and A. Pugachev, *J. Alloys Compd.*, 2022, **905**, 164022.
7. J. Feng, X. Xu, C. L. Hu and J. G. Mao, *Inorg Chem*, 2019, **58**, 2833-2839.
8. S. Zhao, G. Zhang, J. Yao and Y. Wu, *CrystEngComm*, 2012, **14**, 5209-5214.
9. J. Zhou and R. Li, *J. Solid State Chem.*, 2021, **304**, 122630.
10. M. Mutailipu, Z. Xie, X. Su, M. Zhang, Y. Wang, Z. Yang, M. R. S. A. Janjua and S. Pan, *J. Am. Chem. Soc.*, 2017, **139**, 18397-18405.
11. Z. Xie, M. Mutailipu, G. He, G. Han, Y. Wang, Z. Yang, M. Zhang and S. Pan, *Chem. Mater.*, 2018, **30**, 2414-2423.
12. Z. Xie, Y. Wang, S. Cheng, G. Han, Z. Yang and S. Pan, *Sci. China Mater.*, 2019, **62**, 1151-1161.
13. Y. Li, F. Liang, H. Song, W. Liu, Z. Lin, G. Zhang and Y. Wu, *Inorg Chem*, 2019, **58**, 8943-8947.
14. W. Liu, X. Liu, J. Shen, Y. Li, H. Song, J. Feng, Z. Lin and G. Zhang, *Dalton Trans.*, 2020, **49**, 9355-9361.

15. K. Feng, W. Yin, W. Hao, J. Yao and Y. Wu, *CrystEngComm*, 2013, **15**, 5064-5069.
